# Supplementary material for: Reduction in black carbon light absorption due to multi-pollutant emission control during APEC China 2014
Source: Copernicus journal article supplement (doi:10.5194/acp-18-10275-2018), 2018-07-19
Supplement: Supplementary file 1 [file acp-18-10275-2018-supplement.pdf]

Supplement of Atmos. Chem. Phys., 18, 10275–10287, 2018  
<https://doi.org/10.5194/acp-18-10275-2018-supplement>  
© Author(s) 2018. This work is distributed under  
the Creative Commons Attribution 4.0 License.

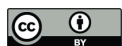

*Supplement of*

## **Reduction in black carbon light absorption due to multi-pollutant emission control during APEC China 2014**

**Yuxuan Zhang et al.**

*Correspondence to:* Meng Li (m.li@mpic.de) and Qiang Zhang (qiangzhang@tsinghua.edu.cn)

The copyright of individual parts of the supplement might differ from the CC BY 4.0 License.

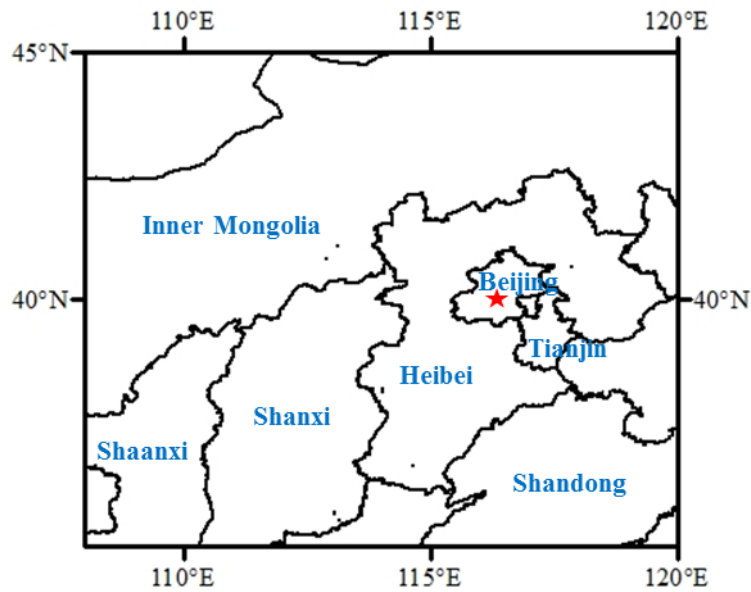

1

2 Figure S1. Location of the observation site (red star).

3

4 Figure S2 shows a similar distribution of effective emission intensity (EEI, defined by  
 5 Lu et al. (2012)) of BC over the site during 3, 5 and 7 days, revealing that the BC  
 6 transported to the site was mainly from emission within 3 days. For “APEC blue”, the  
 7 emission control measures were implement on November 3-12, 2014. Considering BC  
 8 over the site mainly from emission within 3 days, the BC transported to the site during  
 9 the pollution episode on November 3-5 were the mixtures of particles that were  
 10 emitted before and during APEC. Similarly, the BC transported to the site during the  
 11 pollution episode on November 13-16 were the mixtures of particles that were emitted  
 12 during and after APEC. To clearly distinguish BC characteristics with and without  
 13 emission control measures, we exclude this two periods (November 3-5 and 13-16,  
 14 2014) in this study.

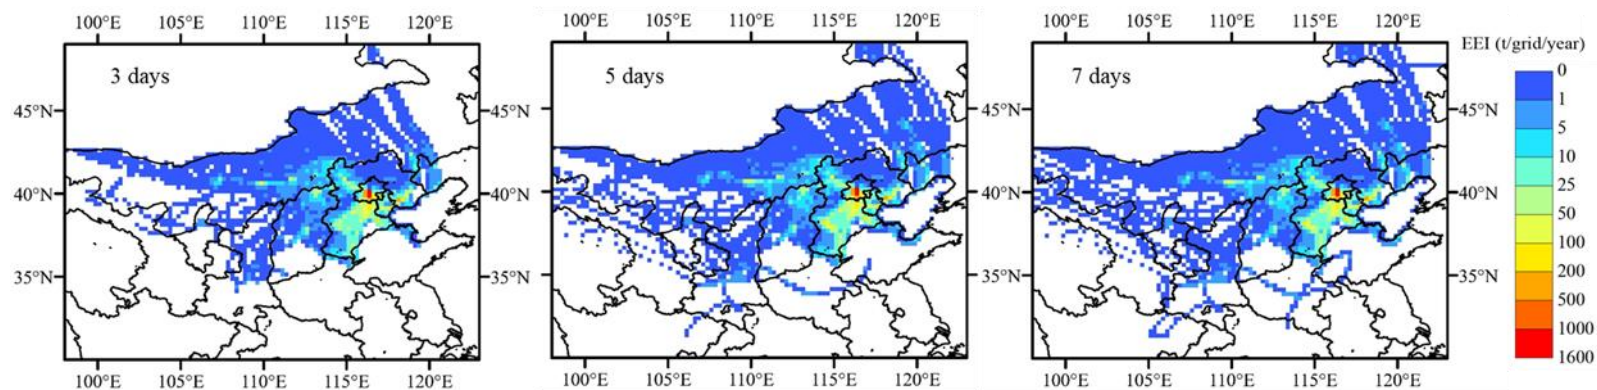

1

2 Figure S2. Spatial distribution ( $0.25^\circ \times 0.25^\circ$ ) of the effective emission intensity (EEI, defined by Lu et al. (2012)) for BC transported to the site  
 3 ( $40^\circ 00' 17''$  N,  $116^\circ 19' 34''$  E) based on 3, 5 and 7 days back-trajectory. The EEI calculation was stated in our previous study (Zhang et al. 2018).

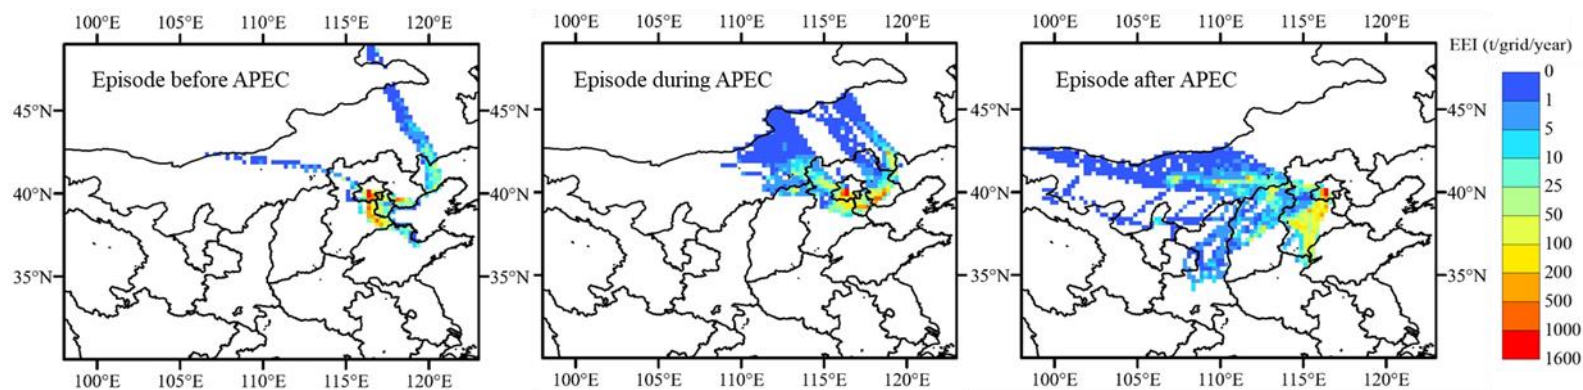

4

5 Figure S3. Spatial distribution ( $0.25^\circ \times 0.25^\circ$ ) of effective emission intensity (EEI) for BC transported to the site ( $40^\circ 00' 17''$  N,  $116^\circ 19' 34''$  E) for  
 6 the pollution episodes before, during and after APEC. The EEI was obtained based on a novel back-trajectory analysis (Lu et al. 2012).

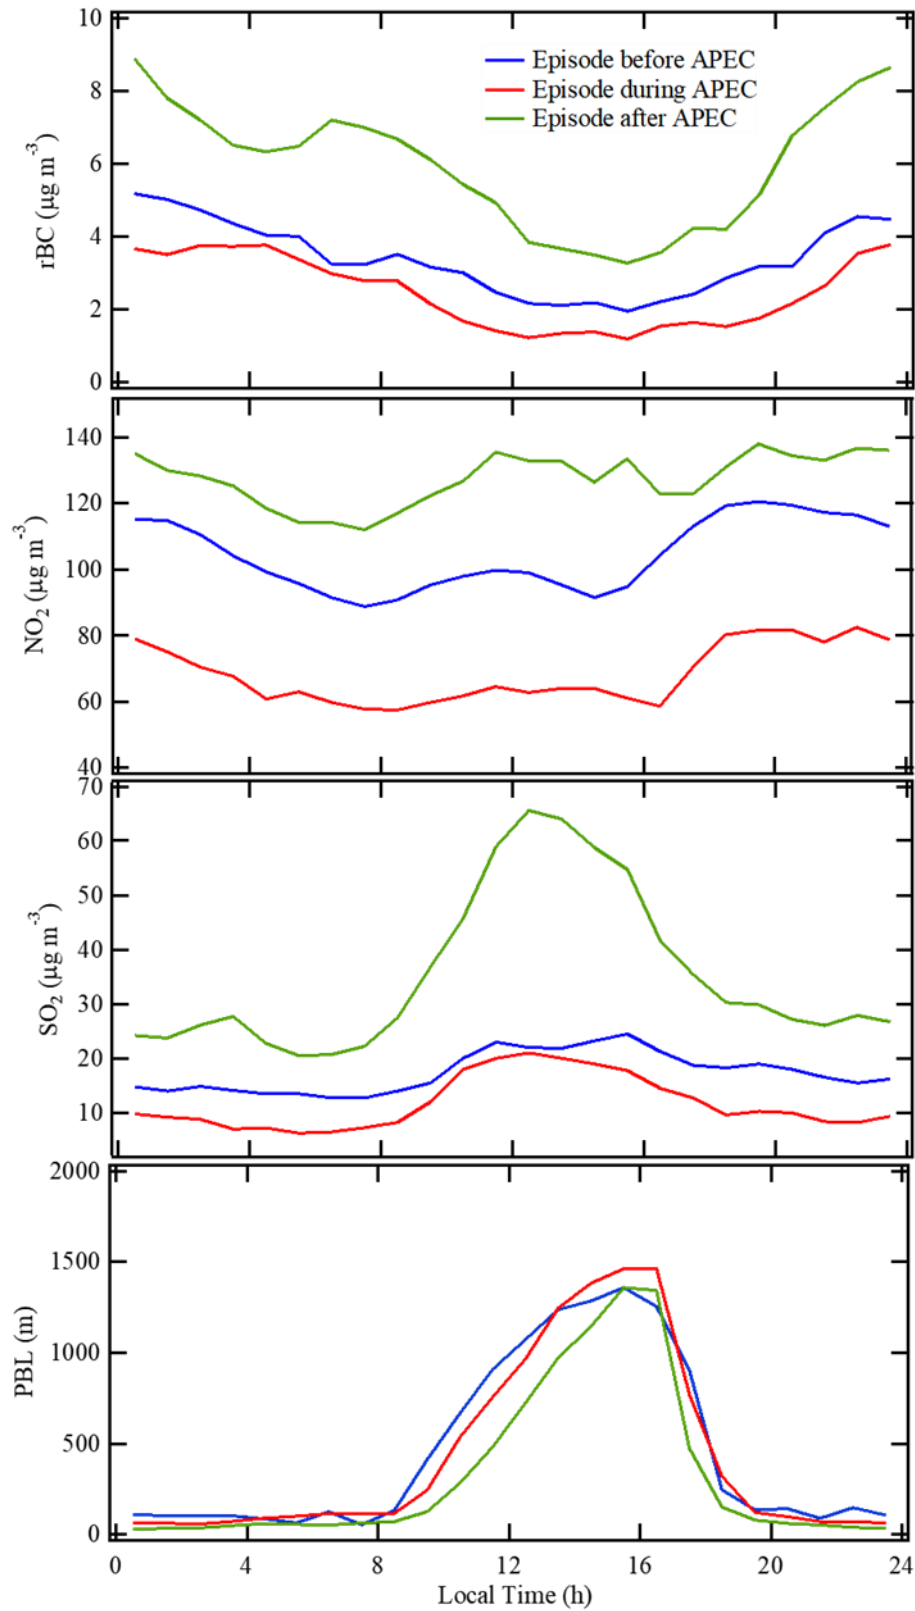

1

2 Figure S4. Diurnal variations of the rBC, NO<sub>2</sub> and SO<sub>2</sub> concentrations and the PBL  
 3 for the pollution episodes before, during and after APEC.

4

1 **References**

2 Lu, Z., Streets, D. G., Zhang, Q., and Wang, S.: A novel back-trajectory analysis of  
3 the origin of black carbon transported to the Himalayas and Tibetan Plateau during  
4 1996–2010, *Geophys. Res. Lett.*, 39, 2012.

5 Zhang, Y., Zhang, Q., Cheng, Y., Su, H., Li, H., Li, M., Zhang, X., Ding, A., and He,  
6 K.: Amplification of light absorption of black carbon associated with air pollution,  
7 *Atmos. Chem. Phys. Discuss.*, <https://doi.org/10.5194/acp-2017-983>, in review, 2018.
